# Supplementary material
Source: HighWire-hosted journal article supplement (https://bmjopen.bmj.com/content/8/4/e022243)
Supplement: inline-supplementary-material-1 [file inline-supplementary-material-1.pdf]

## Appendix 1.

| <b>Data Category</b>                 | <b>Information</b>                                                                                                                                                                                                                                                                                                                                                                                                                                                                                        |
|--------------------------------------|-----------------------------------------------------------------------------------------------------------------------------------------------------------------------------------------------------------------------------------------------------------------------------------------------------------------------------------------------------------------------------------------------------------------------------------------------------------------------------------------------------------|
| Trial Identifying Number             | <a href="http://www.clinicaltrials.gov">http://www.clinicaltrials.gov</a> identifier NCT02481817.                                                                                                                                                                                                                                                                                                                                                                                                         |
| Date of Registration                 | June 25, 2015                                                                                                                                                                                                                                                                                                                                                                                                                                                                                             |
| Secondary Identifying Numbers        | NoAAC PR02                                                                                                                                                                                                                                                                                                                                                                                                                                                                                                |
| Source of Monetary Support           | Patient Centered Outcomes Research Institute (PCORI), Grant ID: 1409-22214                                                                                                                                                                                                                                                                                                                                                                                                                                |
| Primary Sponsor                      | Patient Centered Outcomes Research Institute (PCORI)                                                                                                                                                                                                                                                                                                                                                                                                                                                      |
| Secondary Sponsor                    | North American Airway Collaborative (NoAAC)                                                                                                                                                                                                                                                                                                                                                                                                                                                               |
| Contact for Public Queries           | NoAAC National Trial Coordinator. email: <a href="mailto:coordinator@noaac.net">coordinator@noaac.net</a>                                                                                                                                                                                                                                                                                                                                                                                                 |
| Contact for Scientific Queries       | NoAAC Director Dr. Alexander Gelbard. email: <a href="mailto:director@noaac.net">director@noaac.net</a>                                                                                                                                                                                                                                                                                                                                                                                                   |
| Public Title                         | Treatment Alternatives in Adult Rare Disease; Assessment of Options in Idiopathic Subglottic Stenosis                                                                                                                                                                                                                                                                                                                                                                                                     |
| Scientific Title                     | Treatment Alternatives in Adult Rare Disease; Assessment of Options in Idiopathic Subglottic Stenosis<br>North American Airway Collaborative PR-02 Study (NoAAC PR-02 Study)                                                                                                                                                                                                                                                                                                                              |
| Countries of Recruitment             | International                                                                                                                                                                                                                                                                                                                                                                                                                                                                                             |
| Health Condition Studied             | Idiopathic Subglottic Stenosis (iSGS)                                                                                                                                                                                                                                                                                                                                                                                                                                                                     |
| Intervention(s)                      | Comparison of 3 main surgical techniques to improve breathing.<br>1. Endoscopic dilation, 2. Endoscopic resection, and 3. Open surgery (tracheal/cricotracheal resection)                                                                                                                                                                                                                                                                                                                                 |
| Key Inclusion and Exclusion Criteria | Ages eligible for study: $\geq 18$ years; Sexes eligible for study: both; Accepts healthy volunteers: no                                                                                                                                                                                                                                                                                                                                                                                                  |
|                                      | Inclusion criteria: Adult patients ( $\geq 18$ years), obstructive airway lesion must involve the subglottis.                                                                                                                                                                                                                                                                                                                                                                                             |
|                                      | Exclusion criteria: Patients without capacity to consent for themselves. Patients with history endotracheal intubation or tracheotomy within 2 years of first symptoms. Patients with a history of significant laryngotracheal trauma, neck irradiation, caustic or thermal injury to the laryngotracheal complex, or major anterior neck surgery. Patients with a clinical diagnosis of vasculitis or collagen vascular disease, patients with a positive antinuclear cytoplasmic antibody (ANCA) titer. |
| Study Type                           | Observational                                                                                                                                                                                                                                                                                                                                                                                                                                                                                             |
|                                      | Allocation: non-randomized; Intervention model: Pragmatic                                                                                                                                                                                                                                                                                                                                                                                                                                                 |
|                                      | Purpose: Treatment Efficacy                                                                                                                                                                                                                                                                                                                                                                                                                                                                               |
| Date of First Enrollment             | July 1, 2015                                                                                                                                                                                                                                                                                                                                                                                                                                                                                              |
| Sample Size                          | Proposed sample size of 300 (endo dilation $\approx$ 180, endo resection $\approx$ 60, open surgery $\approx$ 60 )                                                                                                                                                                                                                                                                                                                                                                                        |
| Primary Outcome(s)                   | Treatment effectiveness defined as time to recurrent operative procedure.                                                                                                                                                                                                                                                                                                                                                                                                                                 |
| Key Secondary Outcomes               | Secondary endpoints relate to treatment side effects and include patient reported outcome measures in voice, swallowing, breathing, and global quality of life, as well as patient generated health data.                                                                                                                                                                                                                                                                                                 |
| Ethics Review                        | This protocol was approved by the IRB Committee of the Vanderbilt University July 2015                                                                                                                                                                                                                                                                                                                                                                                                                    |
