# Supplementary material
Source: HighWire-hosted journal article supplement (https://bmjopen.bmj.com/content/8/4/e022243)
Supplement: inline-supplementary-material-3 [file inline-supplementary-material-3.pdf]

Treatment Alternatives in Adult Rare Disease; Assessment of Options in Idiopathic Subglottic Stenosis. North American Airway Collaborative PR-02 Study, A Prospective Pragmatic Trial.

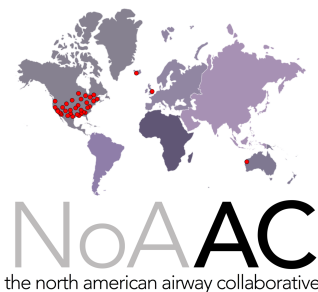

Local Site Investigator Surgical Protocol

**Provider**

Name

Academic Rank (*circle one*):

Instructor

Assistant Professor

Associate Professor

Professor

Institution

Fellowship training (*circle one*):

Pediatric Oto,

Laryngology

Head & Neck

None

Years out of training (*circle one*):

1-5

5-10

>10

**Support Staff**

Administrative Assistant:

Research Coordinator:

**iSGS: Provider Specific Management**

Initial Work-up (*circle all that apply*):

Labs

PFTs

GI (pH, impedance and/or endoscopy)

CT scan

Criteria for intervention (*circle all that apply*):

Patient Symptoms,

Physical Exam

Objective measures

(ie. PFTs or Peak Flow meter)

**Open Technique:**

Number of Open Cases/year \_\_\_\_\_

Criteria for recommendation for open surgery

*Describe:*

Surgical Technique (*circle one*):

Cricotracheal Resection

Laryngotracheoplasty

Other

**Endoscopic Technique:**

Anesthesia (*circle one*):

Spontaneous Ventilation

Jet Ventilation

LMA

Ventilating Bronchoscope

Scar management (*circle one*):

CO2 laser incisions

cold knife

none

CO2 laser resection of scar

other (explain)

Dilation Technique (*circle one*):

Balloon

Bougie

Pediatric Bronchoscope

No dilation

Adjuvant Therapy (*circle one*):

PPI

Inhaled Corticosteroid

Antibiotics (ie Bactrim or Azithro)

Other - describe

Transcutaneous Steroids

None
